# Supplementary material for: Involvement of Transporters in Intestinal Drug–Drug Interactions of Oral Targeted Anticancer Drugs Assessed by Changes in Drug Absorption Time
Source: MDPI journal article supplement (doi:10.3390/pharmaceutics14112493), 2022-11-17
Supplement: s1 [file s1]

**Table S1.** Pharmacologic class (ATC5 and ATC4 classification), initial approval indication and approval date by the FDA and the sponsor of oral targeted anticancer drugs.

| Drug          | ATC5 classification                                                            | ATC4 classification | Initial approval indication                                                                         | FDA Approval | Sponsor                         |
|---------------|--------------------------------------------------------------------------------|---------------------|-----------------------------------------------------------------------------------------------------|--------------|---------------------------------|
| Abemaciclib   | Cyclin-dependent kinase (cdk) inhibitors                                       | kinase inhibitor    | breast cancer                                                                                       | 2017         | Eli Lilly                       |
| Acalabrutinib | Bruton's tyrosine kinase inhibitor                                             | kinase inhibitor    | mantle cell lymphoma                                                                                | 2017         | Acerta Pharma B.V.              |
| Afatinib      | Epidermal growth factor receptor (egfr) tyrosine kinase inhibitors             | kinase inhibitor    | non-small cell lung cancer                                                                          | 2013         | Boehringer Ingelheim            |
| Alectinib     | Anaplastic lymphoma kinase (alk) inhibitors                                    | kinase inhibitor    | non-small cell lung cancer                                                                          | 2016         | Roche                           |
| Alpelisib     | Phosphatidylinositol-3-kinase (pi3k) inhibitor                                 | kinase inhibitor    | breast cancer                                                                                       | 2019         | Novartis                        |
| Avapritinib   | Other protein kinase inhibitors                                                | kinase inhibitor    | gastrointestinal stromal tumor                                                                      | 2020         | Blueprint Medicines Corporation |
| Axitinib      | Vascular endothelial growth factor receptor (vegfr) tyrosine kinase inhibitors | kinase inhibitor    | renal cell carcinoma                                                                                | 2012         | Pfizer                          |
| Baricitinib   | Selective immunosuppressants                                                   | kinase inhibitor    | rheumatoid arthritis                                                                                | 2018         | Eli Lilly                       |
| Birinimetinib | Mitogen-activated protein kinase (mek) inhibitor                               | kinase inhibitor    | melanoma                                                                                            | 2018         | Array Biopharma                 |
| Bosutinib     | Bcr-abl tyrosine kinase inhibitor                                              | kinase inhibitor    | chronic myelogenous leukemia                                                                        | 2012         | Pfizer                          |
| Brigatinib    | Anaplastic lymphoma kinase (alk) inhibitors                                    | kinase inhibitor    | non-small cell lung cancer                                                                          | 2017         | Ariad                           |
| Cabozantinib  | Other protein kinase inhibitors                                                | kinase inhibitor    | medullary thyroid cancer                                                                            | 2012         | Exelixis                        |
| Capmatinib    | Other protein kinase inhibitors                                                | kinase inhibitor    | non-small cell lung cancer                                                                          | 2020         | Novartis                        |
| Ceritinib     | Anaplastic lymphoma kinase (alk) inhibitors                                    | kinase inhibitor    | non-small cell lung cancer                                                                          | 2014         | Novartis                        |
| Cobimetinib   | Mitogen-activated protein kinase (mek) inhibitors                              | kinase inhibitor    | melanoma                                                                                            | 2015         | Genentech                       |
| Crizotinib    | Anaplastic lymphoma kinase (alk) inhibitors                                    | kinase inhibitor    | non-small cell lung cancer                                                                          | 2011         | Pfizer                          |
| Dabrafenib    | B-raf serine-threonine kinase (braf) inhibitors                                | kinase inhibitor    | melanoma                                                                                            | 2013         | GSK                             |
| Dacomitinib   | Epidermal growth factor receptor (egfr) tyrosine kinase inhibitors             | kinase inhibitor    | non-small cell lung cancer                                                                          | 2018         | Pfizer                          |
| Dasatinib     | Tyrosine kinase inhibitor                                                      | kinase inhibitor    | chronic myelogenous leukemia                                                                        | 2006         | BMS                             |
| Duvelisib     | Kinase inhibitor - dual inhibitor of PI3K-δ and PI3K-γ                         | kinase inhibitor    | chronic Lymphocytic Leukemia & Small Lymphocytic Lymphoma                                           | 2018         | Verastem                        |
| Enasidenib    | Other antineoplastic agents                                                    | IDH-I               | acute myeloid leukemia                                                                              | 2017         | Celgene                         |
| Encorafenib   | B-raf serine-threonine kinase (braf) inhibitors                                | kinase inhibitor    | melanoma                                                                                            | 2018         | Array                           |
| Entrectinib   | Other protein kinase inhibitors                                                | kinase inhibitor    | non-small cell lung cancer                                                                          | 2019         | Genentech                       |
| Erdafitinib   | Kinase inhibitor                                                               | kinase inhibitor    | urothelial carcinoma                                                                                | 2019         | Janssen                         |
| Erlotinib     | Epidermal growth factor receptor (egfr) tyrosine kinase inhibitors             | kinase inhibitor    | non-small cell lung cancer                                                                          | 2005         | Genentech                       |
| Fedratinib    | Janus-associated kinase (jak) inhibitors                                       | kinase inhibitor    | myelofibrosis                                                                                       | 2019         | Celgene                         |
| Fostamatinib  | Other systemic hemostatics (Syk kinase inhibitor)                              | kinase inhibitor    | chronic immune thrombocytopenia                                                                     | 2018         | Rigel Pharmaceuticals           |
| Gefitinib     | tyrosine kinase inhibitor                                                      | kinase inhibitor    | non-small cell lung cancer                                                                          | 2003         | Astra Zeneca                    |
| Gilteritinib  | Other protein kinase inhibitors                                                | kinase inhibitor    | acute myeloid leukemia                                                                              | 2018         | Astellas                        |
| Glasdegib     | Hedgehog pathway inhibitors                                                    | HP-I                | acute myeloid leukemia                                                                              | 2018         | Pfizer                          |
| Ibrutinib     | Inhibitor of Bruton's tyrosine kinase                                          | kinase inhibitor    | chronic lymphocytic leukemia and Mantle cell lymphoma                                               | 2013         | Pharmacyclics,                  |
| Idelalisib    | Inhibitor of phosphatidylinositol 3-kinase, PI3Kδ                              | kinase inhibitor    | chronic lymphocytic leukemia, follicular B-cell non-Hodgkin lymphoma and small lymphocytic lymphoma | 2014         | Gilead                          |
| Inatinib      | tyrosine kinase inhibitor                                                      | kinase inhibitor    | chronic myelogenous leukemia                                                                        | 2001         | Novartis                        |
| Infgratinib   | tyrosine kinase inhibitor                                                      | kinase inhibitor    | cholangiocarcinoma                                                                                  | 2021         | QED Therapeutics                |
| Ivosidenib    | Other antineoplastic agents                                                    | IDH-I               | acute myeloid leukemia                                                                              | 2018         | Agiros Pharmaceuticals          |
| Lapatinib     | Kinase inhibitor                                                               | kinase inhibitor    | breast cancer                                                                                       | 2007         | Novartis                        |
| Larotrectinib | Other protein kinase inhibitors                                                | kinase inhibitor    | solid tumors harboring an NTRK gene fusion                                                          | 2018         | Bayer - Loxo Oncology           |
| Lenvatinib    | Other protein kinase inhibitors                                                | kinase inhibitor    | thyroid cancer, renal cell carcinoma, hepatocellular carcinoma and non-small cell lung cancer       | 2015         | Eisai                           |
| Lorlatinib    | Anaplastic lymphoma kinase (alk) inhibitors                                    | kinase inhibitor    | non-small cell lung cancer                                                                          | 2018         | Pfizer                          |
| Midostaurin   | Other protein kinase inhibitors                                                | kinase inhibitor    | acute myeloid leukemia, systemic mastocytosis and mast cell leukemia                                | 2017         | Novartis                        |
| Neratinib     | Human epidermal growth factor receptor 2 (her2) tyrosine kinase inhibitors     | kinase inhibitor    | breast cancer                                                                                       | 2017         | Puma Biotechnology              |
| Nilotinib     | tyrosine kinase inhibitor                                                      | kinase inhibitor    | chronic myeloid leukemia                                                                            | 2007         | Novartis                        |
| Niraparib     | poly(ADP-ribose) polymerase (PARP) inhibitors                                  | PARP-I              | ovarian, fallopian tube, or primary peritoneal cancer                                               | 2017         | Tesaro                          |
| Olaparib      | poly(ADP-ribose) polymerase (PARP) inhibitors                                  | PARP-I              | ovarian, breast, pancreatic and prostate cancer                                                     | 2017         | Astra Zeneca                    |
| Osimertinib   | Kinase inhibitor                                                               | kinase inhibitor    | non-small cell lung cancer                                                                          | 2015         | Astra Zeneca                    |
| Palbociclib   | Cyclin-dependent kinase (cdk) inhibitors                                       | kinase inhibitor    | breast cancer                                                                                       | 2015         | Pfizer                          |
| Pazopanib     | tyrosine kinase inhibitor                                                      | kinase inhibitor    | renal cell carcinoma                                                                                | 2009         | GSK                             |
| Pemigatinib   | Kinase inhibitor                                                               | kinase inhibitor    | cholangiocarcinoma                                                                                  | 2020         | Inocyte Corporation             |
| Pexidartinib  | Kinase inhibitor                                                               | kinase inhibitor    | tenosynovial giant cell tumor                                                                       | 2019         | Daiichi Sankyo                  |
| Ponatinib     | tyrosine kinase inhibitor                                                      | kinase inhibitor    | chronic myelogenous leukemia and acute lymphoblastic leukemia                                       | 2012         | Ariad                           |
| Pralsetinib   | Kinase inhibitor                                                               | kinase inhibitor    | non-small cell lung cancer                                                                          | 2020         | Blueprint Medicines Corporation |
| Regorafenib   | Other protein kinase inhibitors                                                | kinase inhibitor    | colorectal cancer                                                                                   | 2012         | Bayer                           |
| Ribociclib    | Cyclin-dependent kinase (cdk) inhibitors                                       | kinase inhibitor    | breast cancer                                                                                       | 2017         | Novartis                        |
| Ripretinib    | Other protein kinase inhibitors                                                | kinase inhibitor    | gastrointestinal stromal tumor                                                                      | 2020         | Deciphera Pharmaceuticals       |
| Rucaparib     | Poly (adp-ribose) polymerase (parp) inhibitors                                 | PARP-I              | ovarian and prostate cancer                                                                         | 2016         | Clovis Oncology, Inc.           |
| Ruxolitinib   | Janus-associated kinase (jak) inhibitors                                       | kinase inhibitor    | polycythemia vera, myelofibrosis and acute graft-versus-host disease                                | 2011         | Inocyte Corporation             |
| Selpercatinib | Kinase inhibitor                                                               | kinase inhibitor    | non-small cell lung cancer, medullary thyroid cancer                                                | 2020         | Eli Lilly                       |
| Selumetinib   | kinase inhibitor (MEK1/2)                                                      | kinase inhibitor    | Neurofibromatosis type 1                                                                            | 2020         | Astra Zeneca                    |
| Sonidegib     | Hedgehog pathway inhibitors                                                    | HP-I                | basal cell carcinoma                                                                                | 2015         | Novartis                        |
| Sorafenib     | Other protein kinase inhibitors                                                | kinase inhibitor    | renal cell carcinoma                                                                                | 2005         | Bayer                           |
| Sotorasib     | KRAS inhibitor                                                                 | kinase inhibitor    | non-small cell lung cancer                                                                          | 2021         | Amgen                           |
| Sunitinib     | Other protein kinase inhibitors                                                | kinase inhibitor    | gastrointestinal stromal tumor and renal cell carcinoma                                             | 2006         | Pfizer                          |
| Talazoparib   | Poly (adp-ribose) polymerase (parp) inhibitors                                 | PARP-I              | breast cancer                                                                                       | 2018         | Pfizer                          |
| Tepotinib     | Other protein kinase inhibitors                                                | kinase inhibitor    | non-small cell lung cancer                                                                          | 2021         | EMD Serono                      |
| Tivozanib     | Vascular endothelial growth factor receptor (vegfr) tyrosine kinase inhibitors | kinase inhibitor    | renal cell carcinoma                                                                                | 2021         | AVEO                            |
| Tofacitinib   | Selective immunosuppressants                                                   | kinase inhibitor    | rheumatoid arthritis                                                                                | 2012         | Pharmaceuticals                 |
| Trametinib    | Kinase inhibitor                                                               | kinase inhibitor    | metastatic melanoma                                                                                 | 2013         | Pfizer                          |
| Tucatinib     | Kinase inhibitor                                                               | kinase inhibitor    | breast cancer                                                                                       | 2020         | GSK                             |
| Umbralisib    | Kinase inhibitor                                                               | kinase inhibitor    | follicular lymphoma and Marginal Zone Lymphoma                                                      | 2021         | Seattle Genetics                |
| Upadacitinib  | Selective immunosuppressants                                                   | kinase inhibitor    | rheumatoid arthritis                                                                                | 2019         | TG Therapeutics                 |
| Vandetanib    | Other protein kinase inhibitors                                                | kinase inhibitor    | medullary thyroid cancer                                                                            | 2011         | AbbVie                          |
| Vemurafenib   | B-raf serine-threonine kinase (braf) inhibitors                                | kinase inhibitor    | melanoma                                                                                            | 2011         | Astra Zeneca                    |
| Vismodegib    | Hedgehog pathway inhibitors                                                    | HP-I                | basal cell carcinoma                                                                                | 2012         | Genentech                       |
| Zanubrutinib  | Bruton's tyrosine kinase inhibitor                                             | kinase inhibitor    | mantle cell lymphoma                                                                                | 2019         | Genentech                       |
