# Supplementary material for: Involvement of Transporters in Intestinal Drug–Drug Interactions of Oral Targeted Anticancer Drugs Assessed by Changes in Drug Absorption Time
Source: MDPI journal article supplement (doi:10.3390/pharmaceutics14112493), 2022-11-17
Supplement: s1 [file s1]

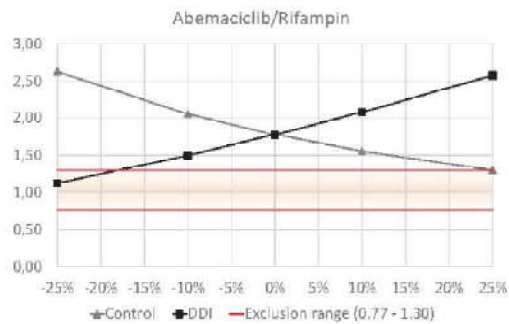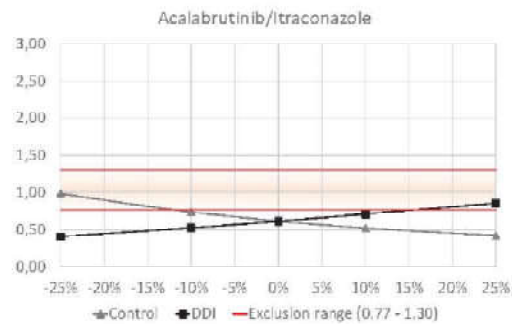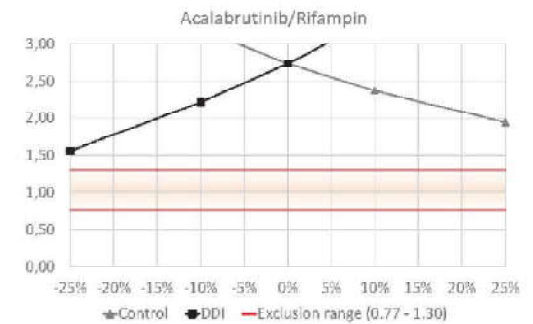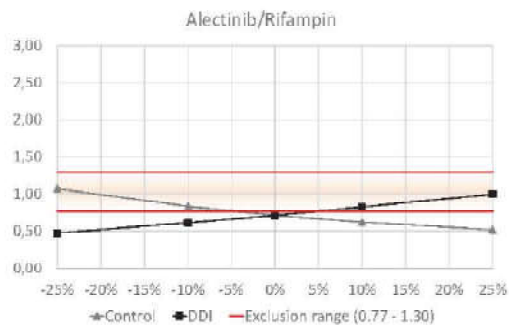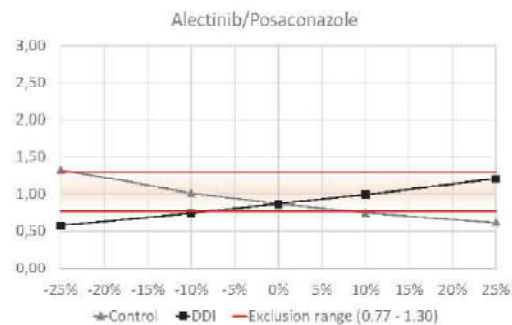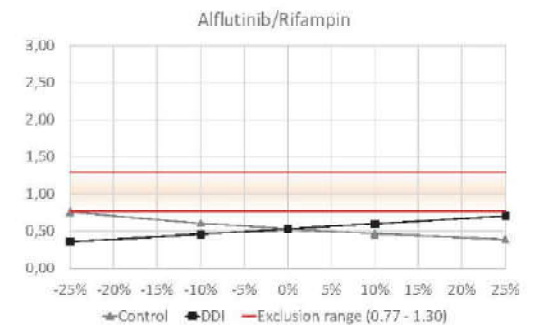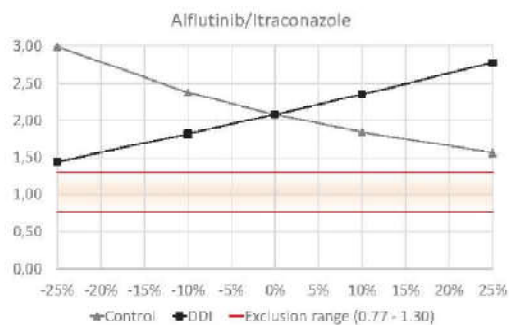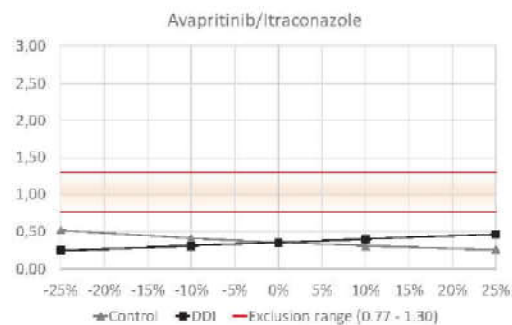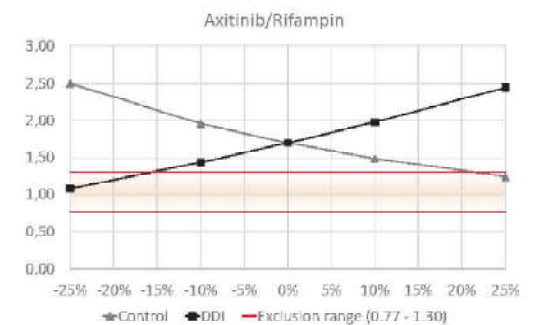

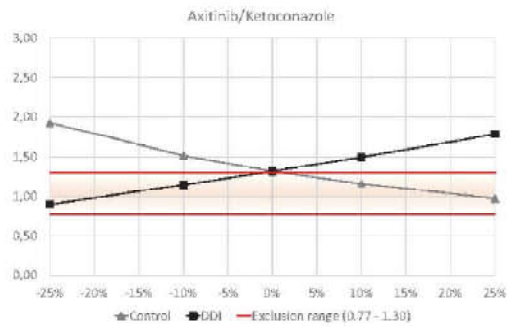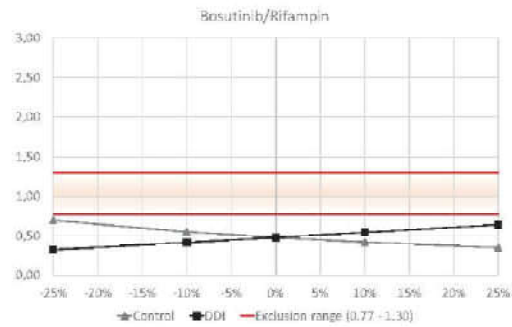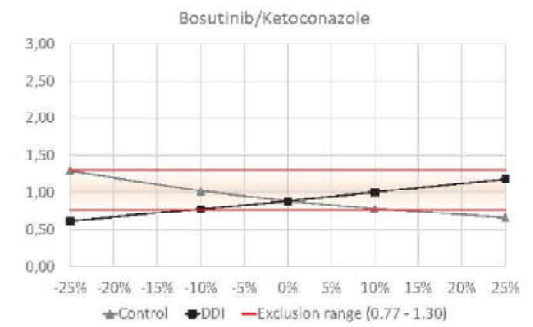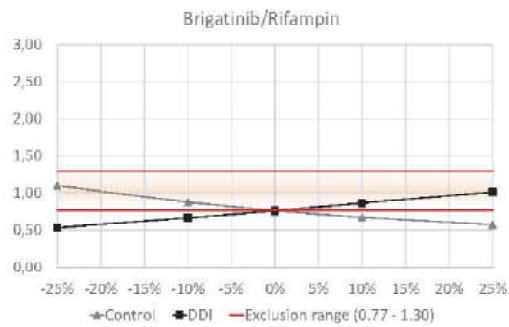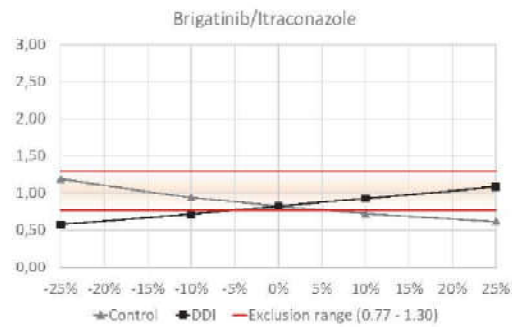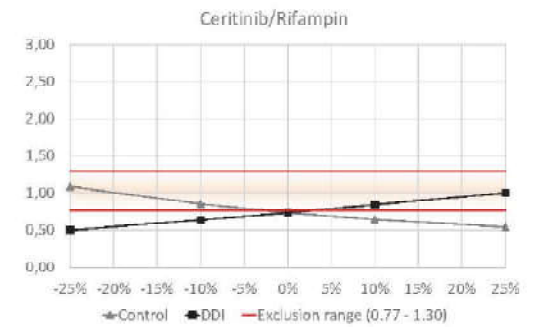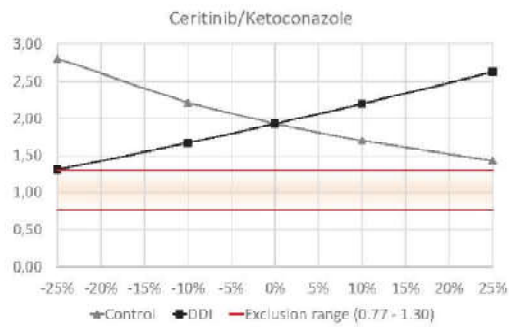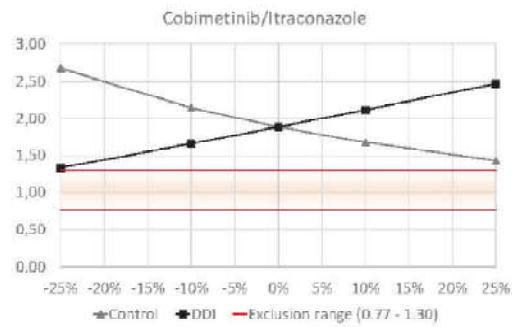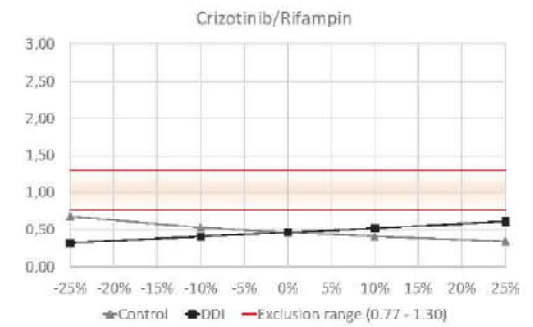

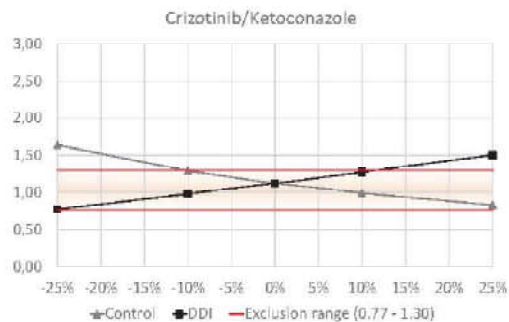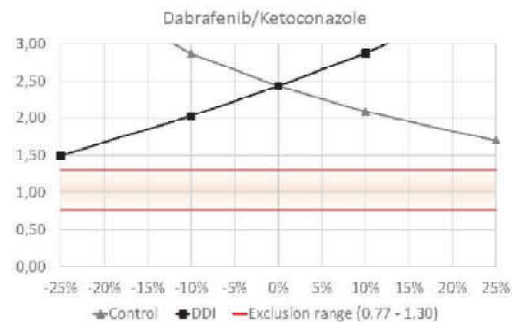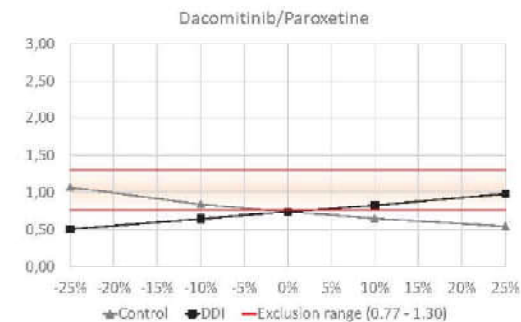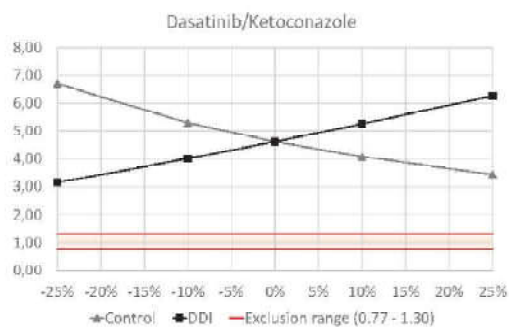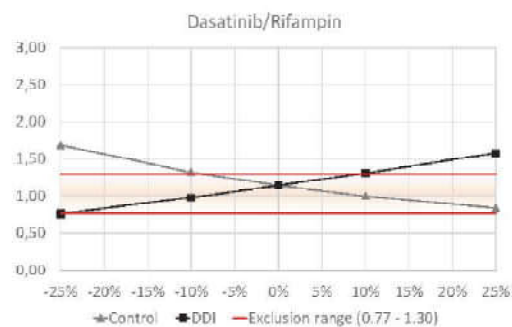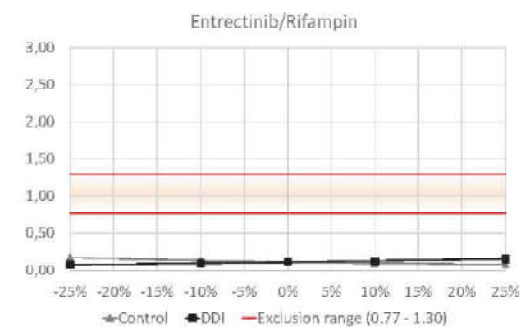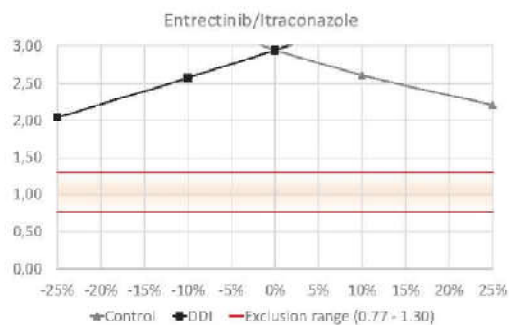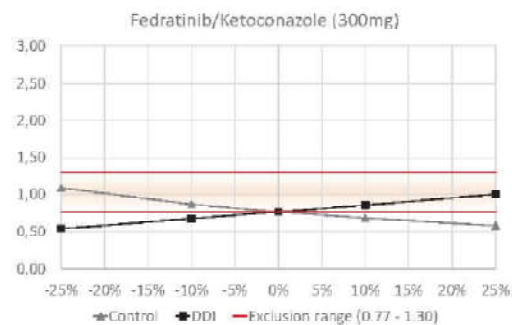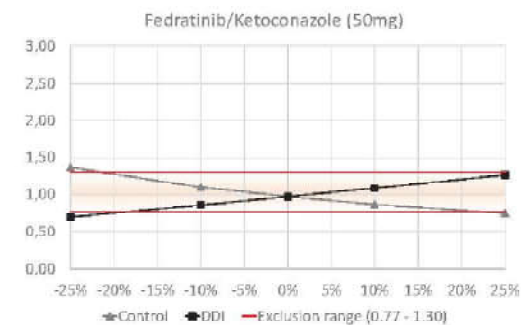

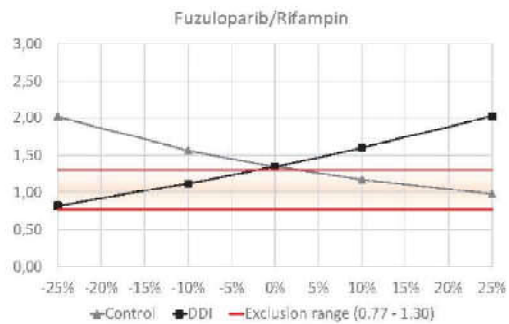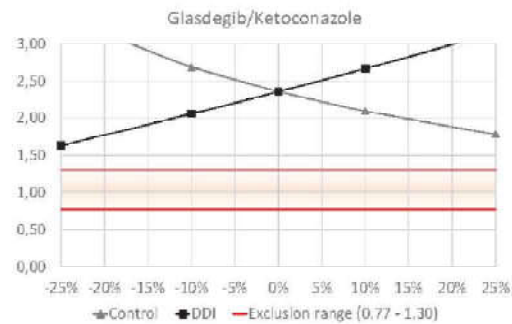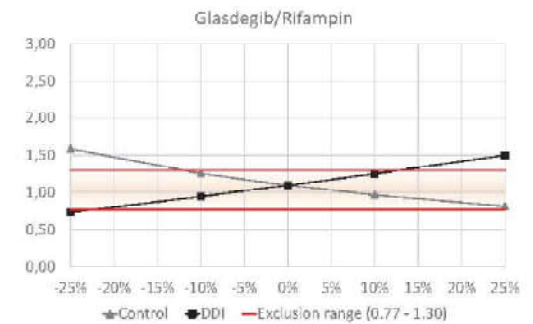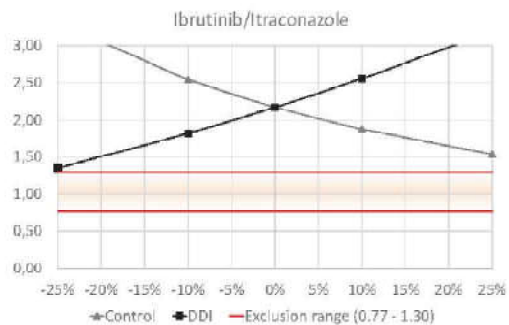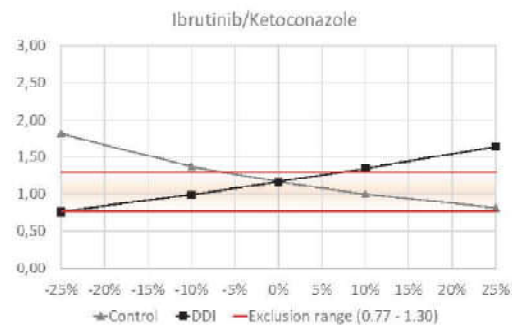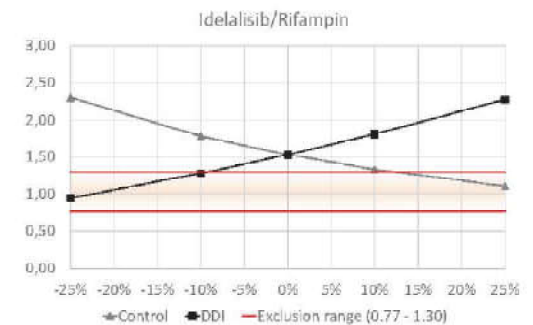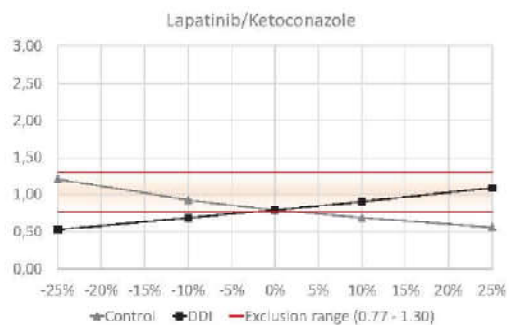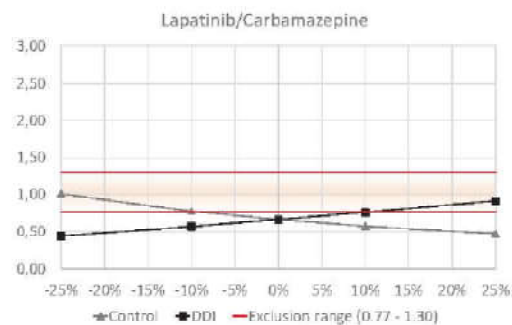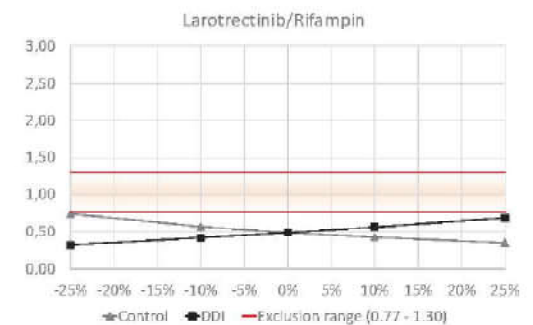

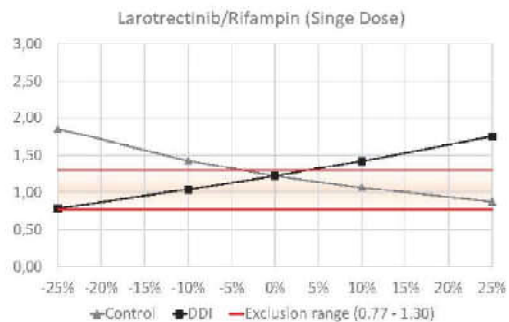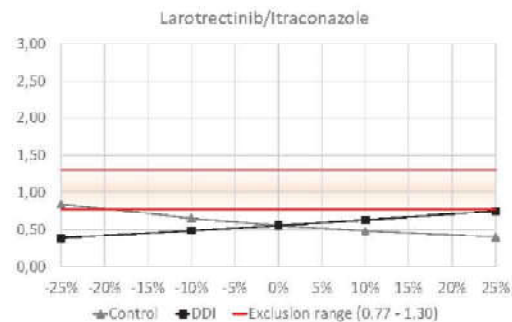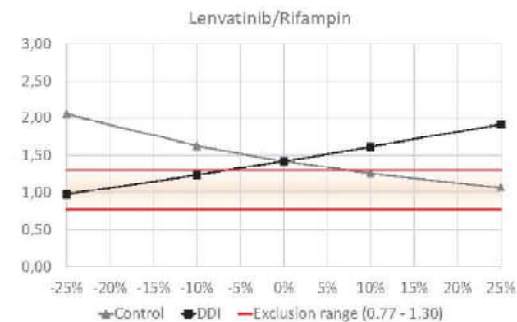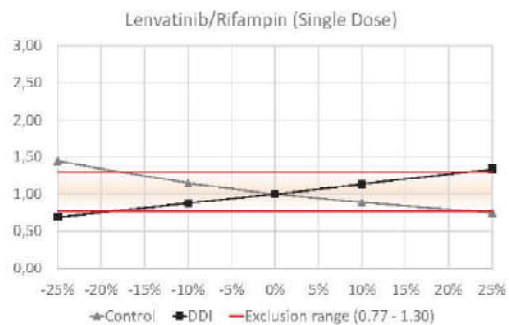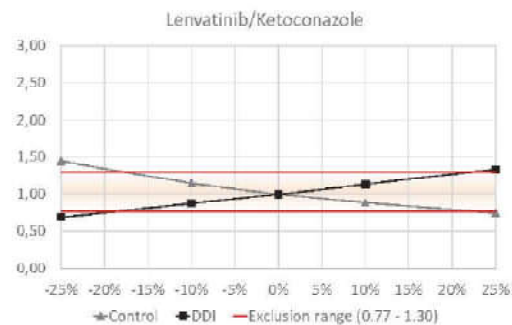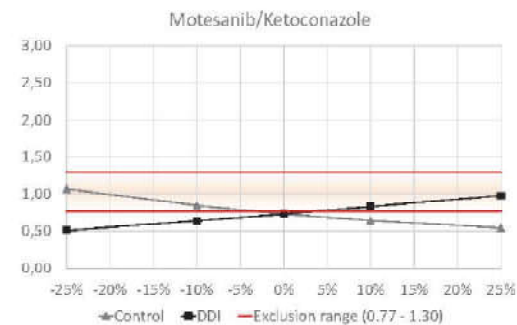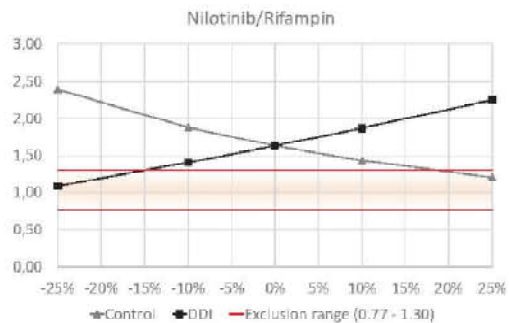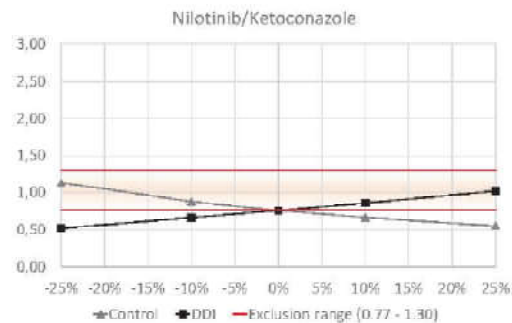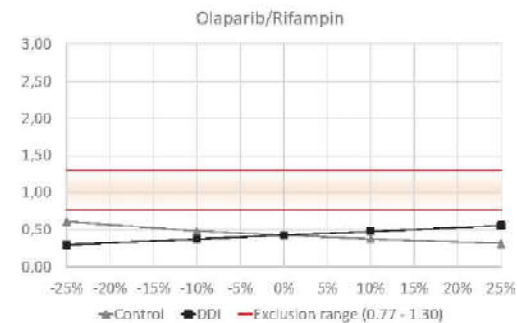

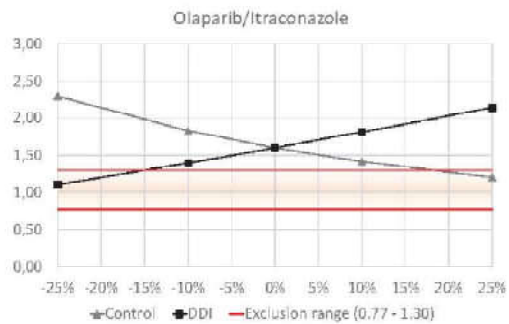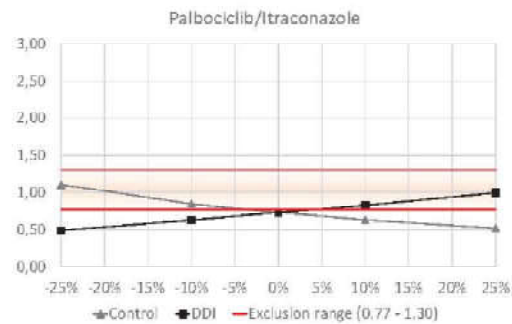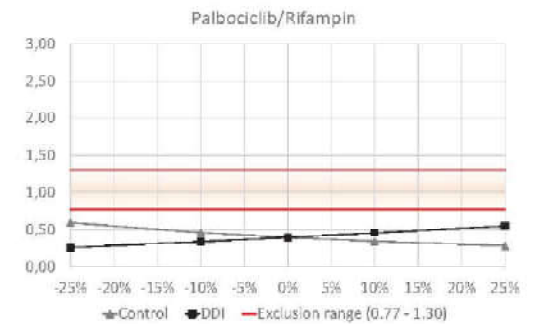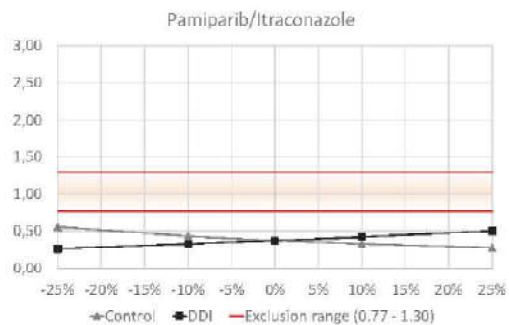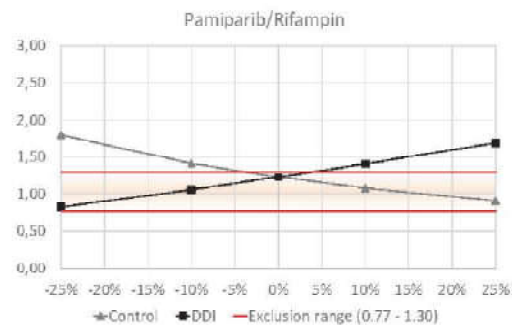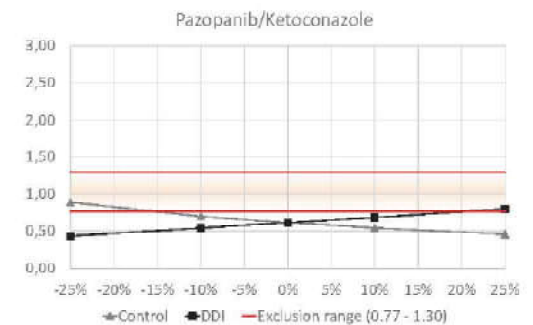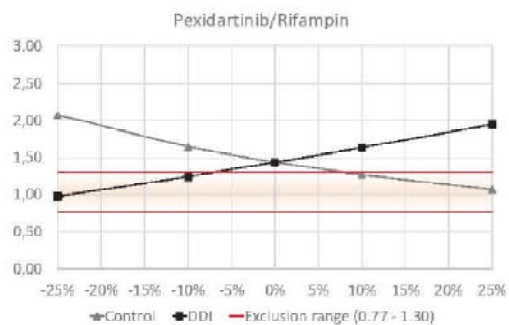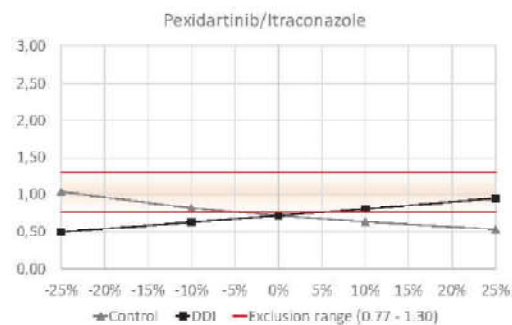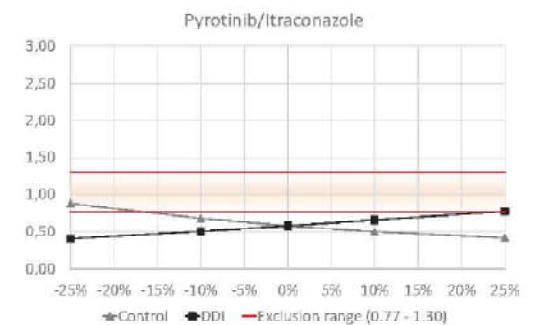

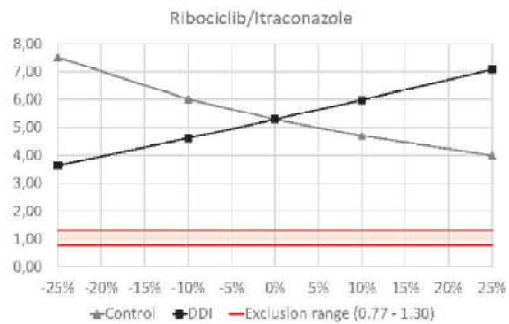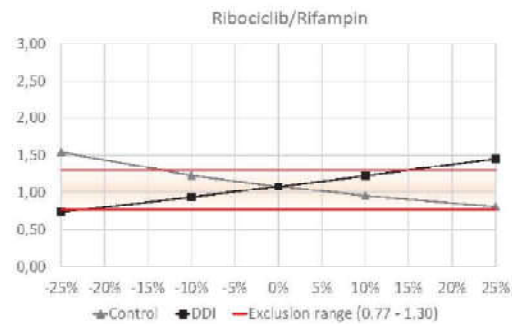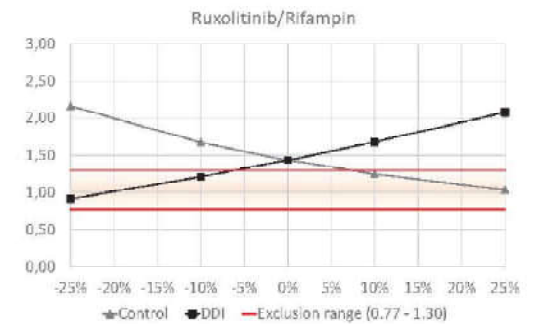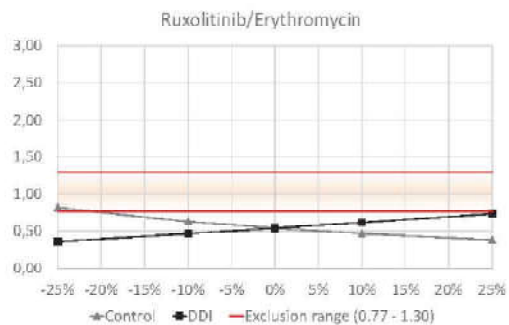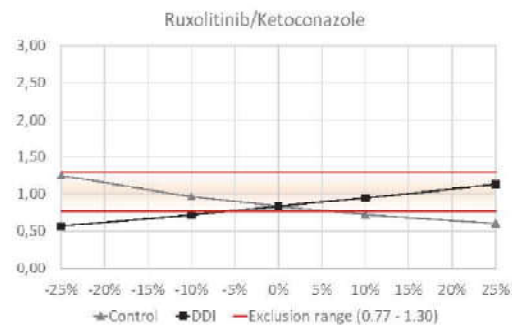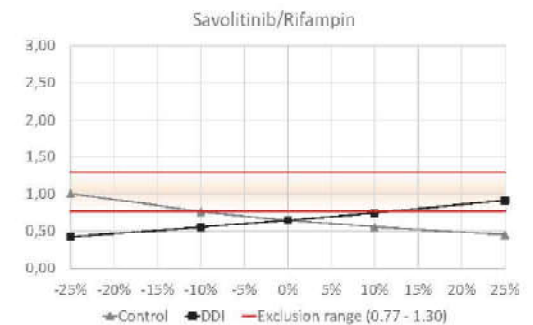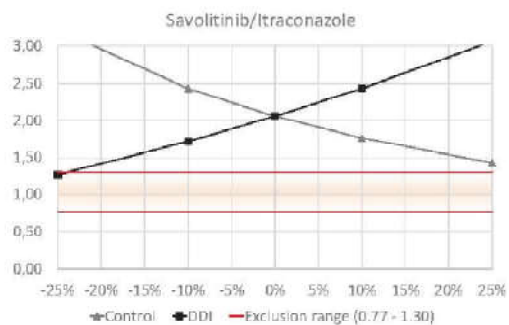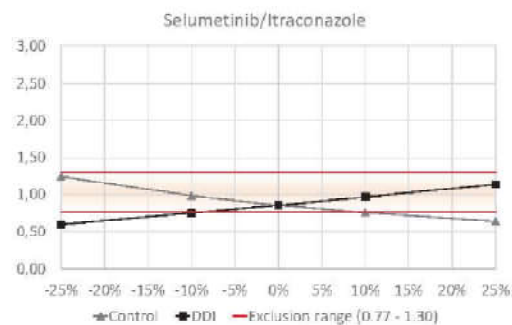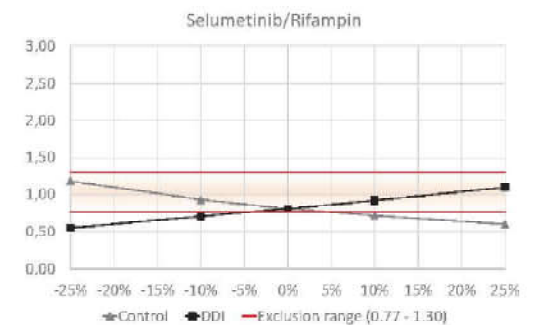

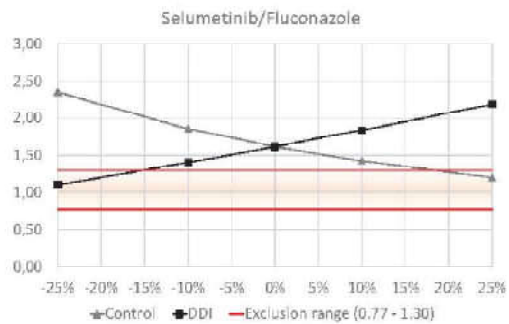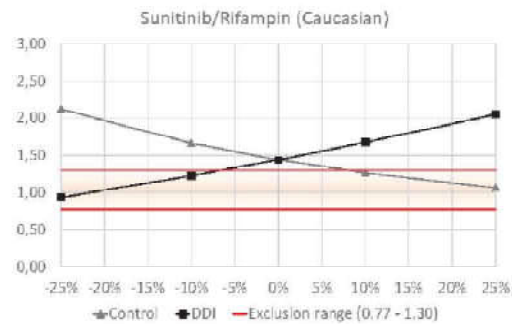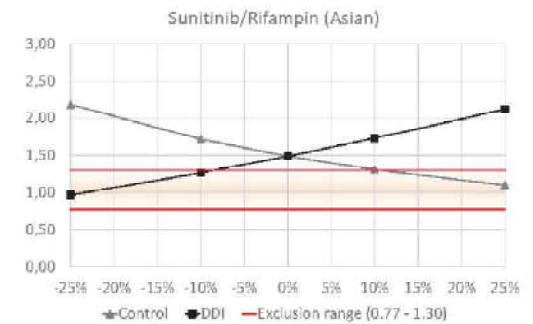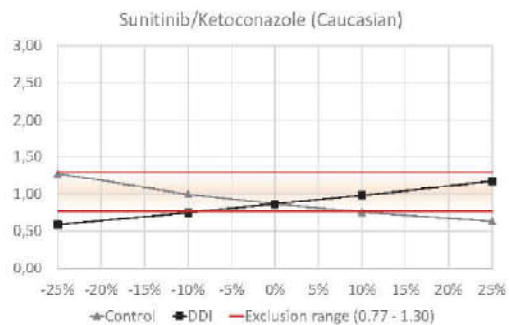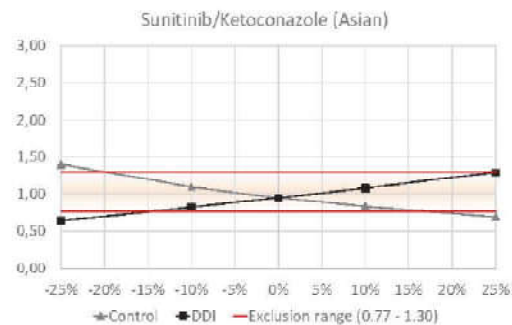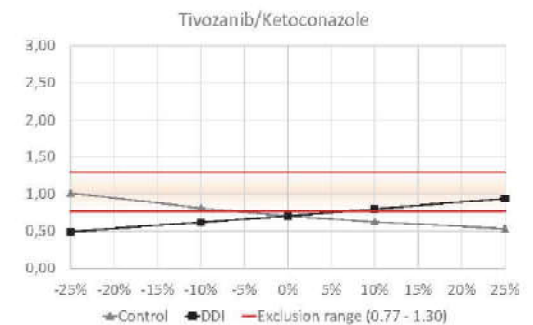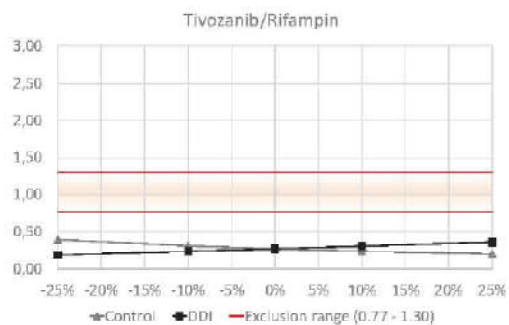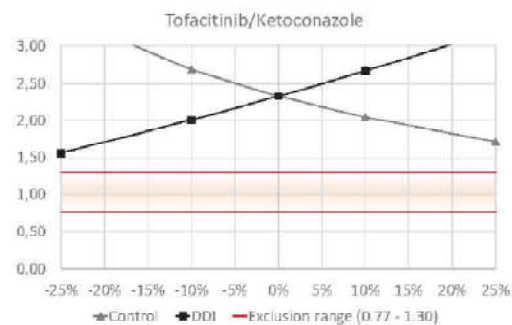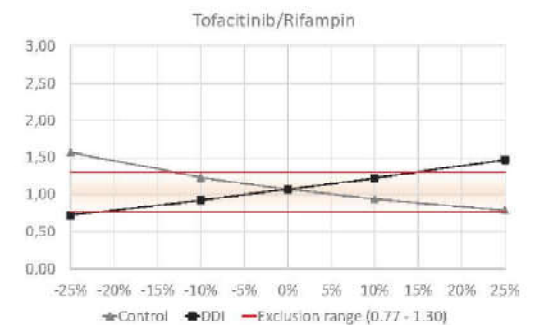

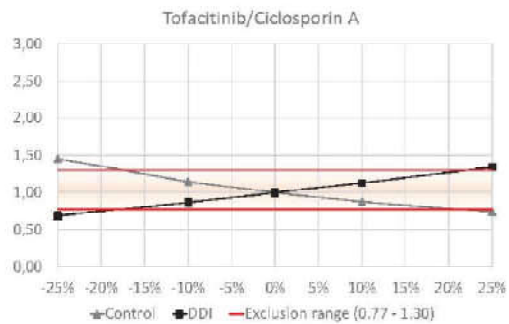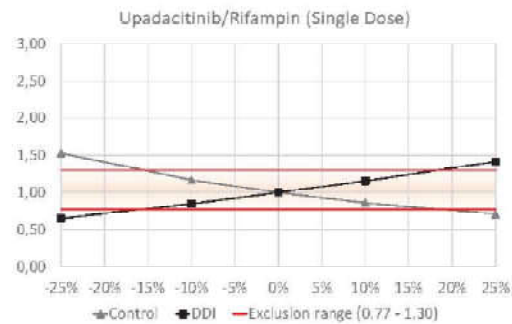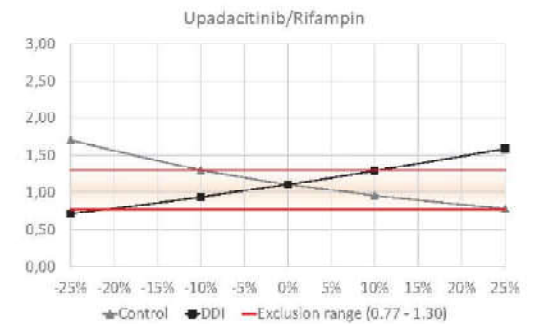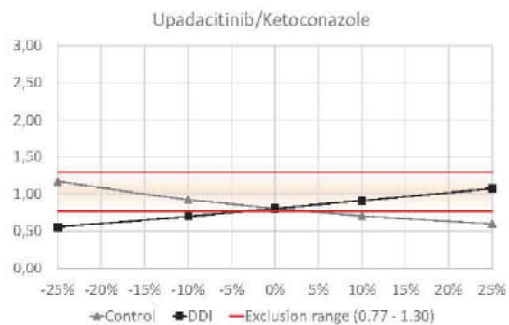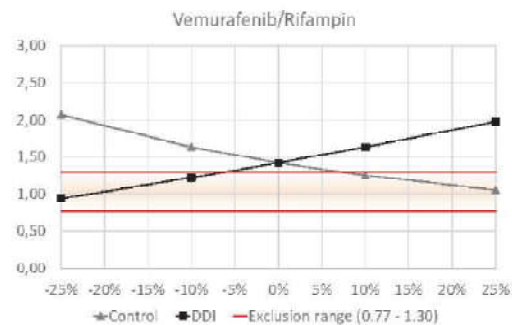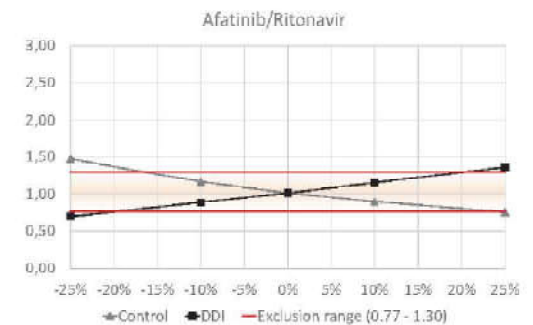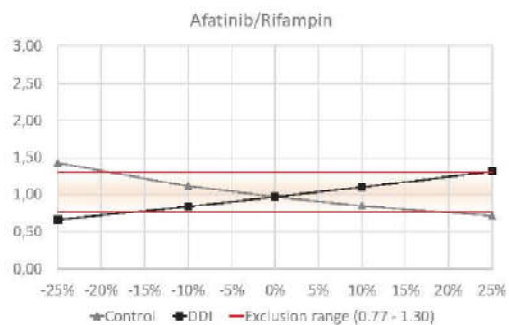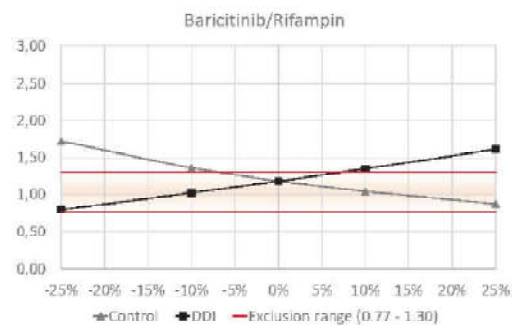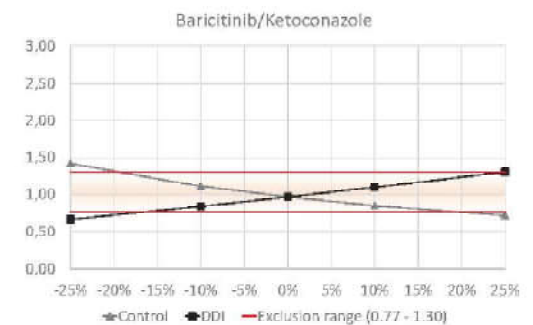

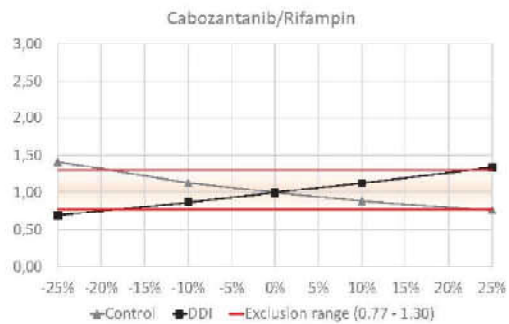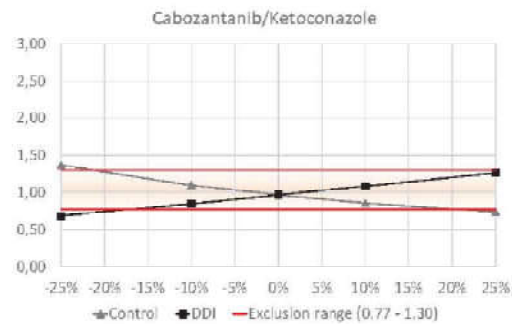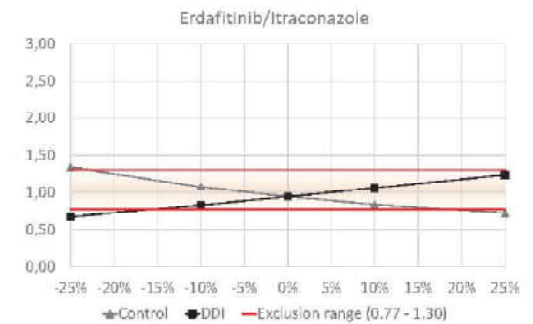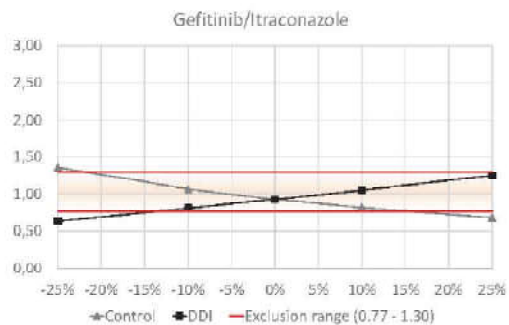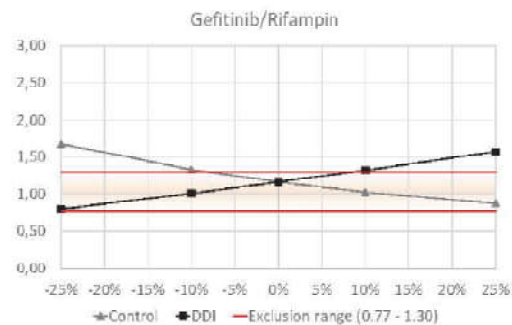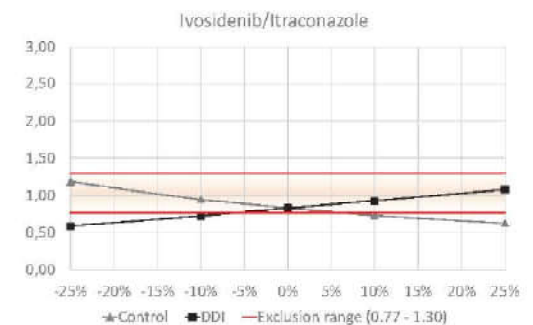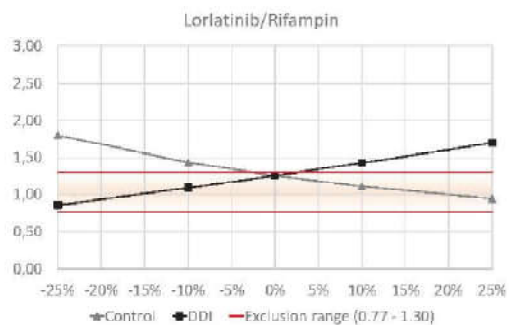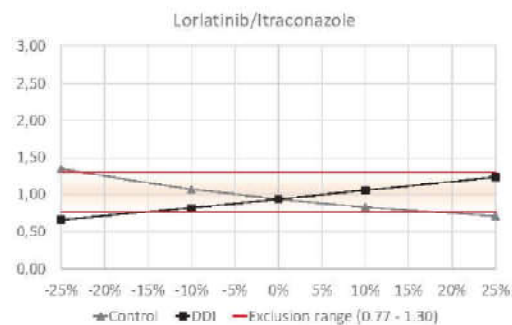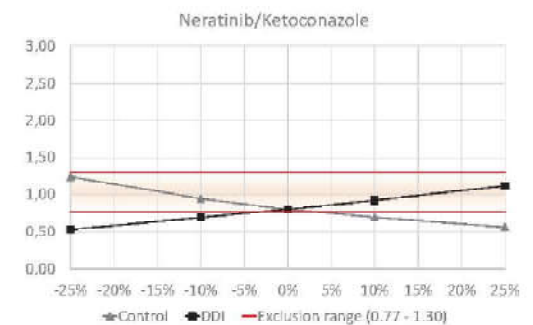

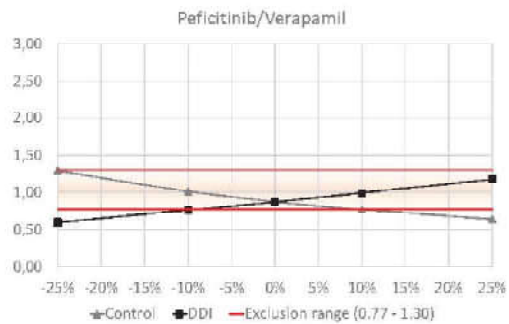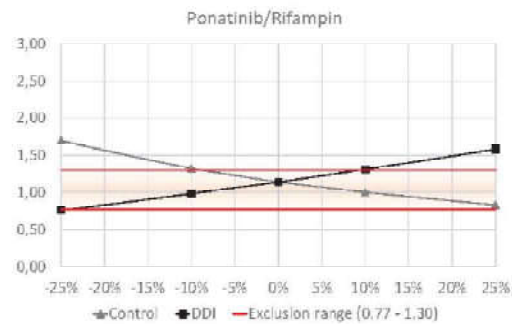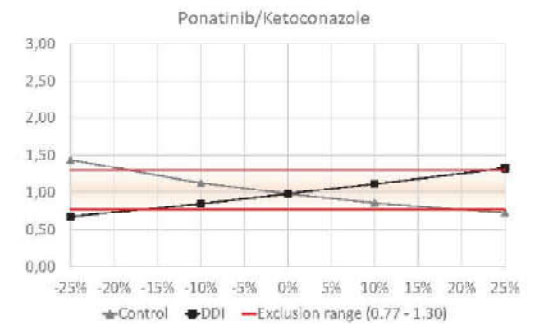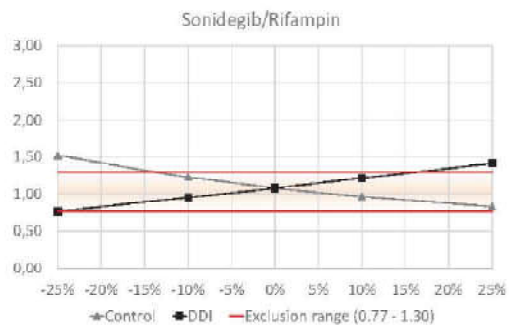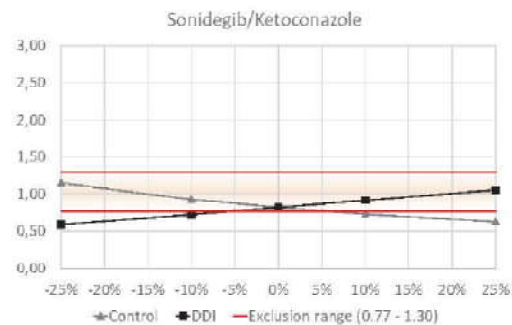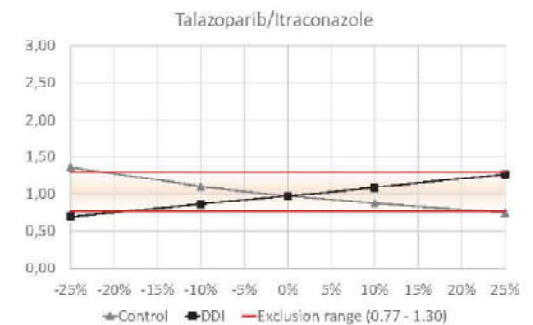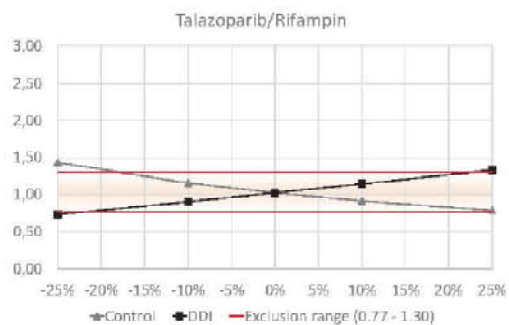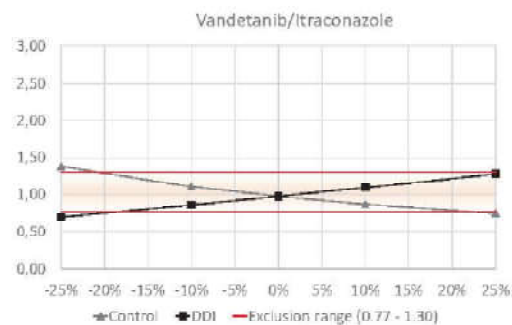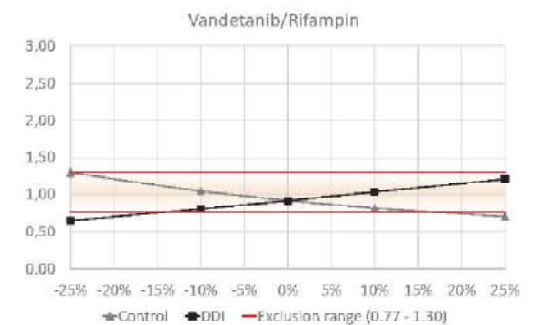

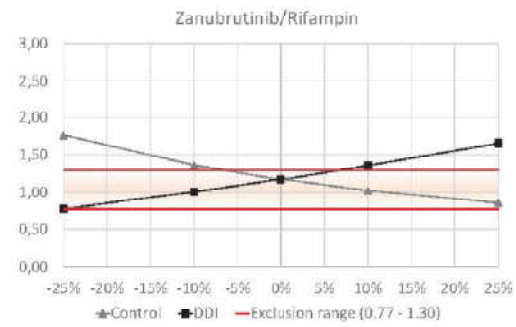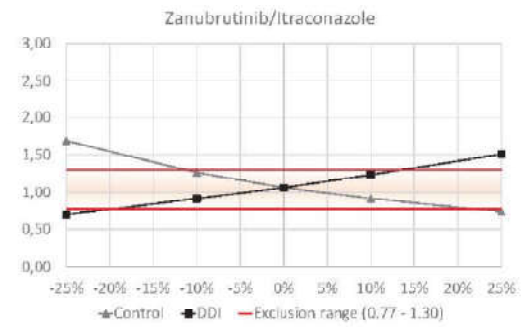

**Annex 3.** Simulations in MAT ratio (y-axis) following  $\pm 10\%$  and  $\pm 25\%$  variations in Tmax (x-axis) in a series of oral targeted anticancer drugs. The calculated MAT ratio from the respective induction and inhibition DDI studies correspond to 0 %.

MAT ratio outside the 0.77-1.30 interval, and remaining outside this interval following simulation variations in Tmax ( $\pm 10\%$ ) are considered as relevant marker of a variation in the absorption rate. The methodology of calculation is described in details in the material and method section.
