# Supplementary material for: Involvement of Transporters in Intestinal Drug–Drug Interactions of Oral Targeted Anticancer Drugs Assessed by Changes in Drug Absorption Time
Source: MDPI journal article supplement (doi:10.3390/pharmaceutics14112493), 2022-11-17
Supplement: s1 [file s1]

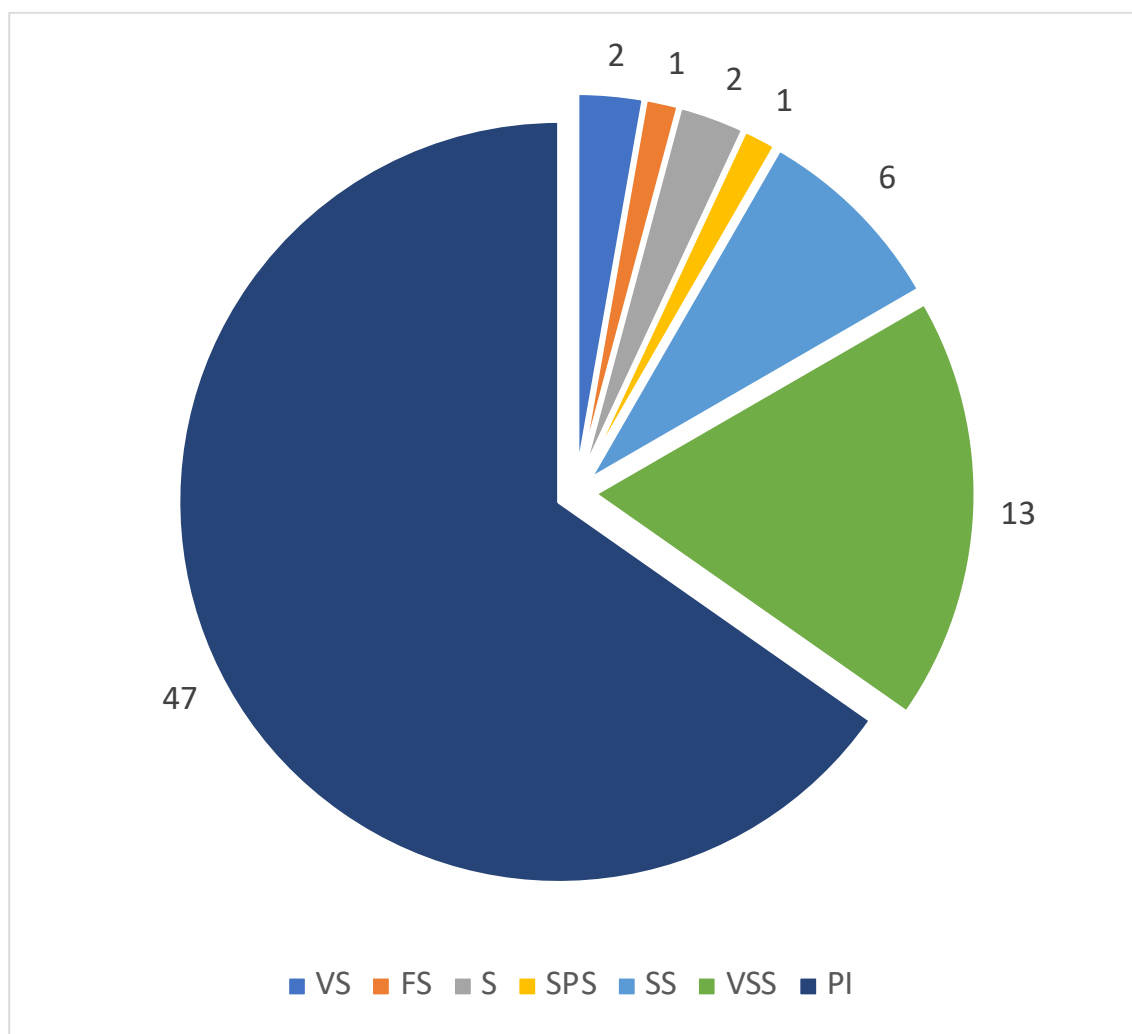

**Figure S2.** Distribution of the solubility at neutral pH classified according to the USP classification in a series of oral targeted anticancer drugs.
