# Supplementary material for: Involvement of Transporters in Intestinal Drug–Drug Interactions of Oral Targeted Anticancer Drugs Assessed by Changes in Drug Absorption Time
Source: MDPI journal article supplement (doi:10.3390/pharmaceutics14112493), 2022-11-17
Supplement: s1 [file s1]

**Table S2.** Estimated concentration in the intestinal lumen at neutral pH (Igut, mM) for a series of oral targeted anticancer drugs.

| Drug          | MW (g/mol) | USP classification at neutral pH | Maximal solubility at neutral pH (mg/ml) | Usual dose per administration (mg) | Theoretical maximal concentration (dose / 250 ml, mg/ml) | ratio between maximal solubility and theoretical concentration | Igut, estimated concentration in the intestinal lumen at neutral pH (mM) |
|---------------|------------|----------------------------------|------------------------------------------|------------------------------------|----------------------------------------------------------|----------------------------------------------------------------|--------------------------------------------------------------------------|
| Abemaciclib   | 507        | PI                               | 0.1                                      | 150                                | 0.6                                                      | 6.00                                                           | 0.20                                                                     |
| Acalabrutinib | 466        | PI                               | 0.1                                      | 100                                | 0.4                                                      | 4.00                                                           | 0.21                                                                     |
| Afatinib      | 486        | S                                | 100                                      | 40                                 | 0.16                                                     | 0.00                                                           | 0.33                                                                     |
| Alectinib     | 483        | PI                               | 0.1                                      | 600                                | 2.4                                                      | 24.00                                                          | 0.21                                                                     |
| Alpelisib     | 442        | PI                               | 0.1                                      | 300                                | 1.2                                                      | 12.00                                                          | 0.23                                                                     |
| Avapritinib   | 499        | PI                               | 0.1                                      | 300                                | 1.2                                                      | 12.00                                                          | 0.20                                                                     |
| Axitinib      | 387        | PI                               | 0.1                                      | 5                                  | 0.02                                                     | 0.20                                                           | 0.05                                                                     |
| Baricitinib   | 371        | PI                               | 0.1                                      | 2                                  | 0.008                                                    | 0.08                                                           | 0.02                                                                     |
| Binimetinib   | 441        | PI                               | 0.1                                      | 45                                 | 0.18                                                     | 1.80                                                           | 0.23                                                                     |
| Bosutinib     | 530        | PI                               | 0.1                                      | 500                                | 2                                                        | 20.00                                                          | 0.19                                                                     |
| Brigatinib    | 441        | VS                               | 1000                                     | 90                                 | 0.36                                                     | 0.00                                                           | 0.82                                                                     |
| Cabozantinib  | 502        | PI                               | 0.1                                      | 140                                | 0.56                                                     | 5.60                                                           | 0.20                                                                     |
| Capmatinib    | 412        | nd                               | nd                                       | 400                                | 1.6                                                      | nd                                                             | nd                                                                       |
| Ceritinib     | 558        | PI                               | 0.1                                      | 750                                | 3                                                        | 30.00                                                          | 0.18                                                                     |
| Cobimetinib   | 532        | VSS                              | 1                                        | 60                                 | 0.24                                                     | 0.24                                                           | 0.45                                                                     |
| Crizotinib    | 450        | PI                               | 0.1                                      | 250                                | 1                                                        | 10.00                                                          | 0.22                                                                     |
| Dabrafenib    | 520        | PI                               | 0.1                                      | 150                                | 0.6                                                      | 6.00                                                           | 0.19                                                                     |
| Dacomitinib   | 470        | PI                               | 0.1                                      | 45                                 | 0.18                                                     | 1.80                                                           | 0.21                                                                     |
| Dasatinib     | 489        | PI                               | 0.1                                      | 70                                 | 0.28                                                     | 2.80                                                           | 0.20                                                                     |
| Duvellisib    | 417        | PI                               | 0.1                                      | 25                                 | 0.1                                                      | 1.00                                                           | 0.24                                                                     |
| Enasidenib    | 473        | PI                               | 0.1                                      | 100                                | 0.4                                                      | 4.00                                                           | 0.21                                                                     |
| Encorafenib   | 540        | PI                               | 0.1                                      | 450                                | 1.8                                                      | 18.00                                                          | 0.19                                                                     |
| Entrectinib   | 561        | PI                               | 0.1                                      | 600                                | 2.4                                                      | 24.00                                                          | 0.18                                                                     |
| Erdafitinib   | 447        | SS                               | 10                                       | 8                                  | 0.032                                                    | 0.00                                                           | 0.07                                                                     |
| Erlotinib     | 393        | VSS                              | 1                                        | 150                                | 0.6                                                      | 0.60                                                           | 1.53                                                                     |
| Fedratinib    | 525        | PI                               | 0.1                                      | 400                                | 1.6                                                      | 16.00                                                          | 0.19                                                                     |
| Fostamatinib  | 581        | SS                               | 10                                       | 100                                | 0.4                                                      | 0.04                                                           | 0.69                                                                     |
| Gefitinib     | 447        | PI                               | 0.1                                      | 250                                | 1                                                        | 10.00                                                          | 0.22                                                                     |
| Gilteritinib  | 553        | SPS                              | 33                                       | 120                                | 0.48                                                     | 0.01                                                           | 0.87                                                                     |
| Glasdegib     | 374        | SS                               | 10                                       | 200                                | 0.8                                                      | 0.08                                                           | 2.14                                                                     |
| Ibrutinib     | 441        | PI                               | 0.1                                      | 500                                | 2                                                        | 20.00                                                          | 0.23                                                                     |
| Idelalisib    | 415        | PI                               | 0.1                                      | 150                                | 0.6                                                      | 6.00                                                           | 0.24                                                                     |
| Imatinib      | 494        | VS                               | 1000                                     | 200                                | 0.8                                                      | 0.00                                                           | 1.62                                                                     |
| Infigratinib  | 560        | PI                               | 0.1                                      | 125                                | 0.5                                                      | 5.00                                                           | 0.18                                                                     |
| Ivosidenib    | 583        | PI                               | 0.1                                      | 500                                | 2                                                        | 20.00                                                          | 0.17                                                                     |
| Lapatinib     | 581        | PI                               | 0.1                                      | 1250                               | 5                                                        | 50.00                                                          | 0.17                                                                     |
| Larotrectinib | 428        | FS                               | 1000                                     | 100                                | 0.4                                                      | 0.00                                                           | 0.93                                                                     |
| Lenvatinib    | 427        | VSS                              | 1                                        | 24                                 | 0.096                                                    | 0.10                                                           | 0.22                                                                     |
| Lorlatinib    | 406        | VSS                              | 1                                        | 100                                | 0.4                                                      | 0.40                                                           | 0.98                                                                     |
| Midostaurin   | 571        | PI                               | 0.1                                      | 50                                 | 0.2                                                      | 2.00                                                           | 0.18                                                                     |
| Neratinib     | 557        | PI                               | 0.1                                      | 240                                | 0.96                                                     | 9.60                                                           | 0.18                                                                     |
| Nilotinib     | 530        | PI                               | 0.1                                      | 400                                | 1.6                                                      | 16.00                                                          | 0.19                                                                     |
| Niraparib     | 320        | SS                               | 10                                       | 300                                | 1.2                                                      | 0.12                                                           | 3.75                                                                     |
| Olaparib      | 435        | VSS                              | 1                                        | 300                                | 1.2                                                      | 1.20                                                           | 2.30                                                                     |
| Osimertinib   | 500        | VSS                              | 1                                        | 80                                 | 0.32                                                     | 0.32                                                           | 0.64                                                                     |
| Palbociclib   | 448        | VSS                              | 1                                        | 125                                | 0.5                                                      | 0.50                                                           | 1.12                                                                     |
| Pazopanib     | 438        | PI                               | 0.1                                      | 800                                | 3.2                                                      | 32.00                                                          | 0.23                                                                     |
| Pemigatinib   | 488        | PI                               | 0.1                                      | 13.5                               | 0.054                                                    | 0.54                                                           | 0.11                                                                     |
| Pexidartinib  | 418        | PI                               | 0.1                                      | 400                                | 1.6                                                      | 16.00                                                          | 0.24                                                                     |
| Ponatinib     | 533        | PI                               | 0.1                                      | 45                                 | 0.18                                                     | 1.80                                                           | 0.19                                                                     |
| Pralsetinib   | 534        | PI                               | 0.1                                      | 400                                | 1.6                                                      | 16.00                                                          | 0.19                                                                     |
| Regorafenib   | 483        | PI                               | 0.1                                      | 160                                | 0.64                                                     | 6.40                                                           | 0.21                                                                     |
| Ribociclib    | 435        | VSS                              | 1                                        | 600                                | 2.4                                                      | 2.40                                                           | 2.30                                                                     |
| Ripretinib    | 510        | PI                               | 0.1                                      | 150                                | 0.6                                                      | 6.00                                                           | 0.20                                                                     |
| Rucaparib     | 323        | SS                               | 10                                       | 600                                | 2.4                                                      | 0.24                                                           | 7.42                                                                     |
| Ruxolitinib   | 306        | VSS                              | 1                                        | 20                                 | 0.08                                                     | 0.08                                                           | 0.26                                                                     |
| Selpercatinib | 526        | VSS                              | 1                                        | 160                                | 0.64                                                     | 0.64                                                           | 1.22                                                                     |
| Selumetinib   | 458        | SS                               | 10                                       | 25                                 | 0.1                                                      | 0.01                                                           | 0.22                                                                     |
| Sonidegib     | 486        | PI                               | 0.1                                      | 200                                | 0.8                                                      | 8.00                                                           | 0.21                                                                     |
| Sorafenib     | 465        | PI                               | 0.1                                      | 400                                | 1.6                                                      | 16.00                                                          | 0.22                                                                     |
| sotorasib     | 561        | PI                               | 0.1                                      | 960                                | 3.84                                                     | 38.40                                                          | 0.18                                                                     |
| Sunitinib     | 399        | S                                | 100                                      | 50                                 | 0.2                                                      | 0.00                                                           | 0.50                                                                     |
| Talazoparib   | 380        | PI                               | 10                                       | 1                                  | 0.004                                                    | 0.00                                                           | 0.01                                                                     |
| Tepotinib     | 493        | nd                               | nd                                       | 450                                | 1.8                                                      | nd                                                             | nd                                                                       |
| Tivozanib     | 455        | PI                               | 0.1                                      | 1.34                               | 0.005                                                    | 0.05                                                           | 0.01                                                                     |
| Tofacitinib   | 312        | VSS                              | 1                                        | 5                                  | 0.02                                                     | 0.02                                                           | 0.06                                                                     |
| Trametinib    | 615        | PI                               | 0.1                                      | 2                                  | 0.008                                                    | 0.08                                                           | 0.01                                                                     |
| Tucatinib     | 481        | VSS                              | 1                                        | 300                                | 1.2                                                      | 1.20                                                           | 2.08                                                                     |
| Umbralisib    | 572        | PI                               | 0.1                                      | 800                                | 3.2                                                      | 32.00                                                          | 0.17                                                                     |
| Upadacitinib  | 380        | VSS                              | 1                                        | 15                                 | 0.06                                                     | 0.06                                                           | 0.16                                                                     |
| Vandetanib    | 475        | PI                               | 0.1                                      | 300                                | 1.2                                                      | 12.00                                                          | 0.21                                                                     |
| Vemurafenib   | 490        | PI                               | 0.1                                      | 960                                | 3.84                                                     | 38.40                                                          | 0.20                                                                     |
| Vismodegib    | 421        | PI                               | 0.1                                      | 150                                | 0.6                                                      | 6.00                                                           | 0.24                                                                     |
| Zanubrutinib  | 472        | PI                               | 0.1                                      | 160                                | 0.64                                                     | 6.40                                                           | 0.21                                                                     |
